# Supplementary material
Source: ML conference proceedings conference paper supplement (https://openreview.net/forum?id=FfIognyBee)

# SUPPLEMENTARY MATERIALS FOR DIFF-INSTRUCT\*

**Anonymous authors**

Paper under double-blind review

The used prompts for Figure 1 (from the top row to the bottom row):

- *The image features close-up portrait of a face with big eyes, overflowing with a mysterious, ethereal ambiance, capturing a direct gaze with the viewer amidst the chiaroscuro interplay of light and shadow, featuring soft colors alongside a splash of color from variously hued flowers, all set against a green retro Gothic night scene reminiscent of Mr X's style, face illuminated, reflective surfaces enhancing the rich, vivid textures, and the delicate details enhanced by octane rendering, cinematic portrayal.*
- *The image features seasoned fisherman portrait, weathered skin etched with deep wrinkles, white beard, piercing gaze beneath a fisherman's hat, softly blurred dock background accentuating rugged features, captured under natural light, ultra-realistic, high dynamic range photo.*
- *A serene meadow with a tree, river, bridge, and mountains in the background under a slightly overcast sunrise sky.*

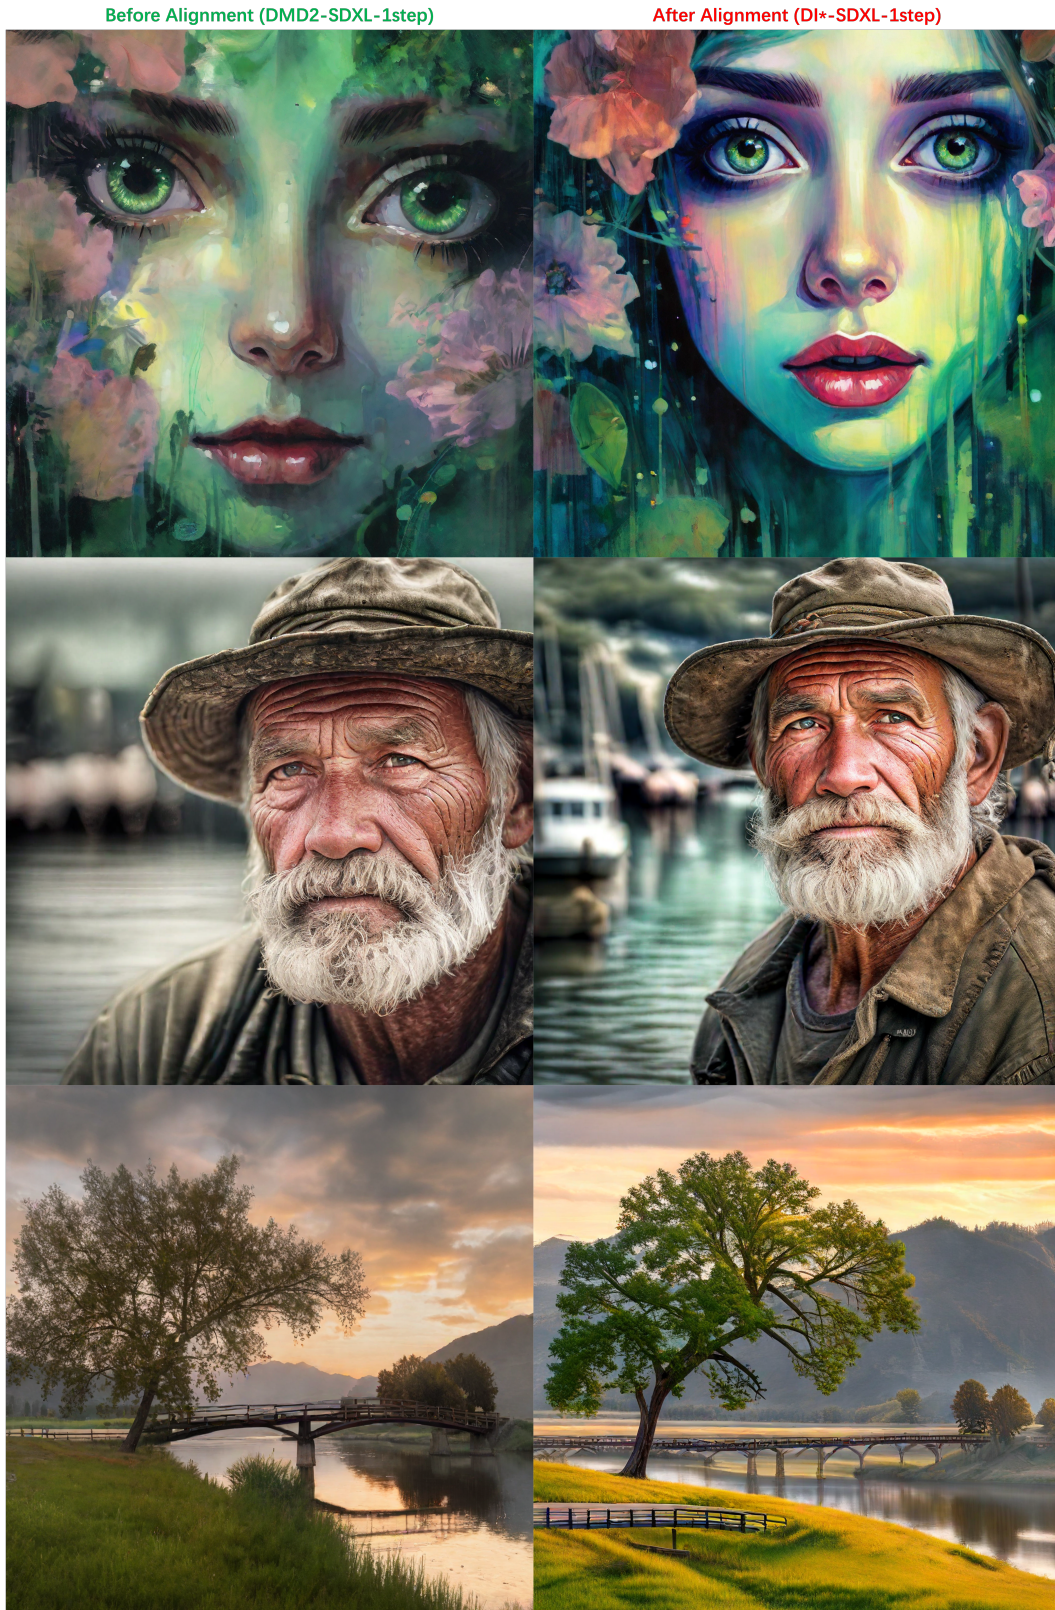

Figure 1: A demonstration of alignment effects of Diff-Instruct\* (Please zoom in to check the details). **Left Column:** the initial one-step model based on SDXL architecture (i.e., DMD2-SDXL-1step); **Right Column:** one-step model aligned with Diff-Instruct\* based on SDXL architecture (i.e. DI\*-SDXL-1step). **The Diff-Instruct\* alignment significantly improves the image quality, resulting in a better layout, richer details, and aesthetic colors.**



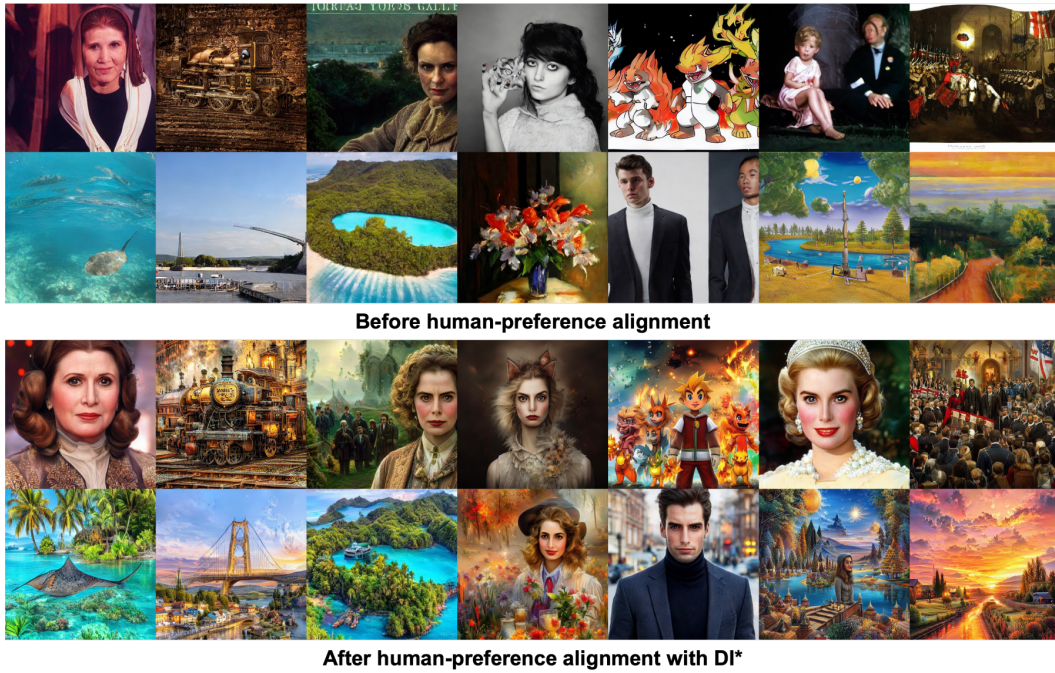

Supplement: supplementary_material [file attachment]
